# Supplementary material for: Personal exposure to PM 2.5 emitted from typical anthropogenic sources in Southern West Africa (SWA): Chemical characteristics and associated health risks
Source: Copernicus journal article supplement (doi:10.5194/acp-2018-1060), 2018-10-26
Supplement: Supplementary file 1 [file acp-2018-1060-supplement.pdf]

## Supplementary Information

### Personal exposure to PM<sub>2.5</sub> emitted from typical anthropogenic sources in Southern West Africa (SWA): Chemical characteristics and associated health risks

Hongmei Xu<sup>1\*,2,3,4</sup>, Jean-François Léon<sup>2</sup>, Cathy Liousse<sup>2\*</sup>, Benjamin Guinot<sup>2</sup>, Véronique Yoboué<sup>5</sup>, Aristide Barthélémy Akpo<sup>6</sup>, Jacques Adon<sup>2</sup>, Kin Fai Ho<sup>7</sup>, Steven Sai Hang Ho<sup>3</sup>, Lijuan Li<sup>3</sup>, Eric Gardrat<sup>2</sup>, Zhenxing Shen<sup>1</sup>, Junji Cao<sup>3</sup>

**Figure S1.** Household cooking stoves and tools used in the target households: (a) Simple coal-burning stove and pot; (b) Another type simple coal-burning stove and jar; (c) Butane gas stove and pot; (d) Simple wood-burning stove (three pieces of stones) and pot.

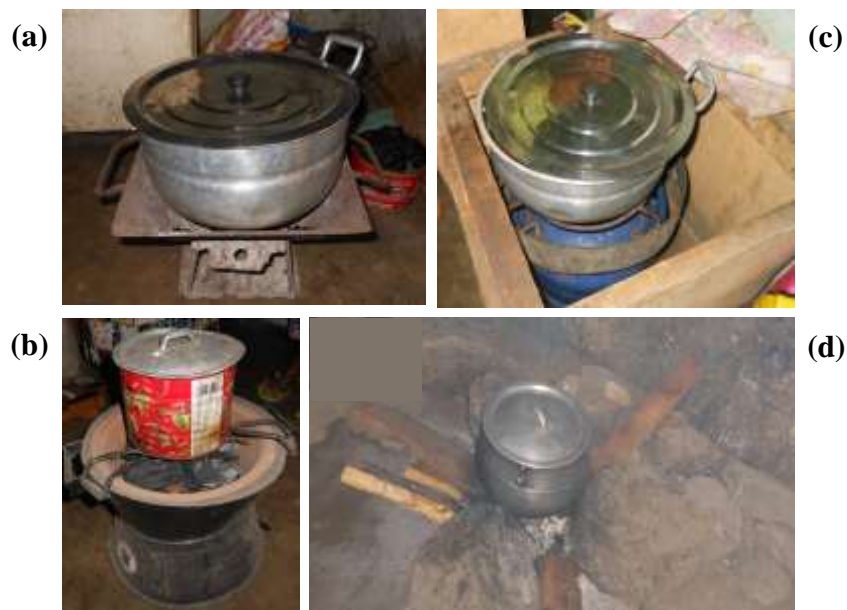

**Figure S1.**
